# Supplementary material for: Characterisation of the global transcriptional response to heat shock and the impact of individual genetic variation
Source: PubMed Central journal article supplement (PMC4995779; doi:10.1186/s13073-016-0345-5), 2016-08-24
Supplement: 13073_2016_345_MOESM4_ESM.pdf [file 13073_2016_345_MOESM4_ESM.pdf]

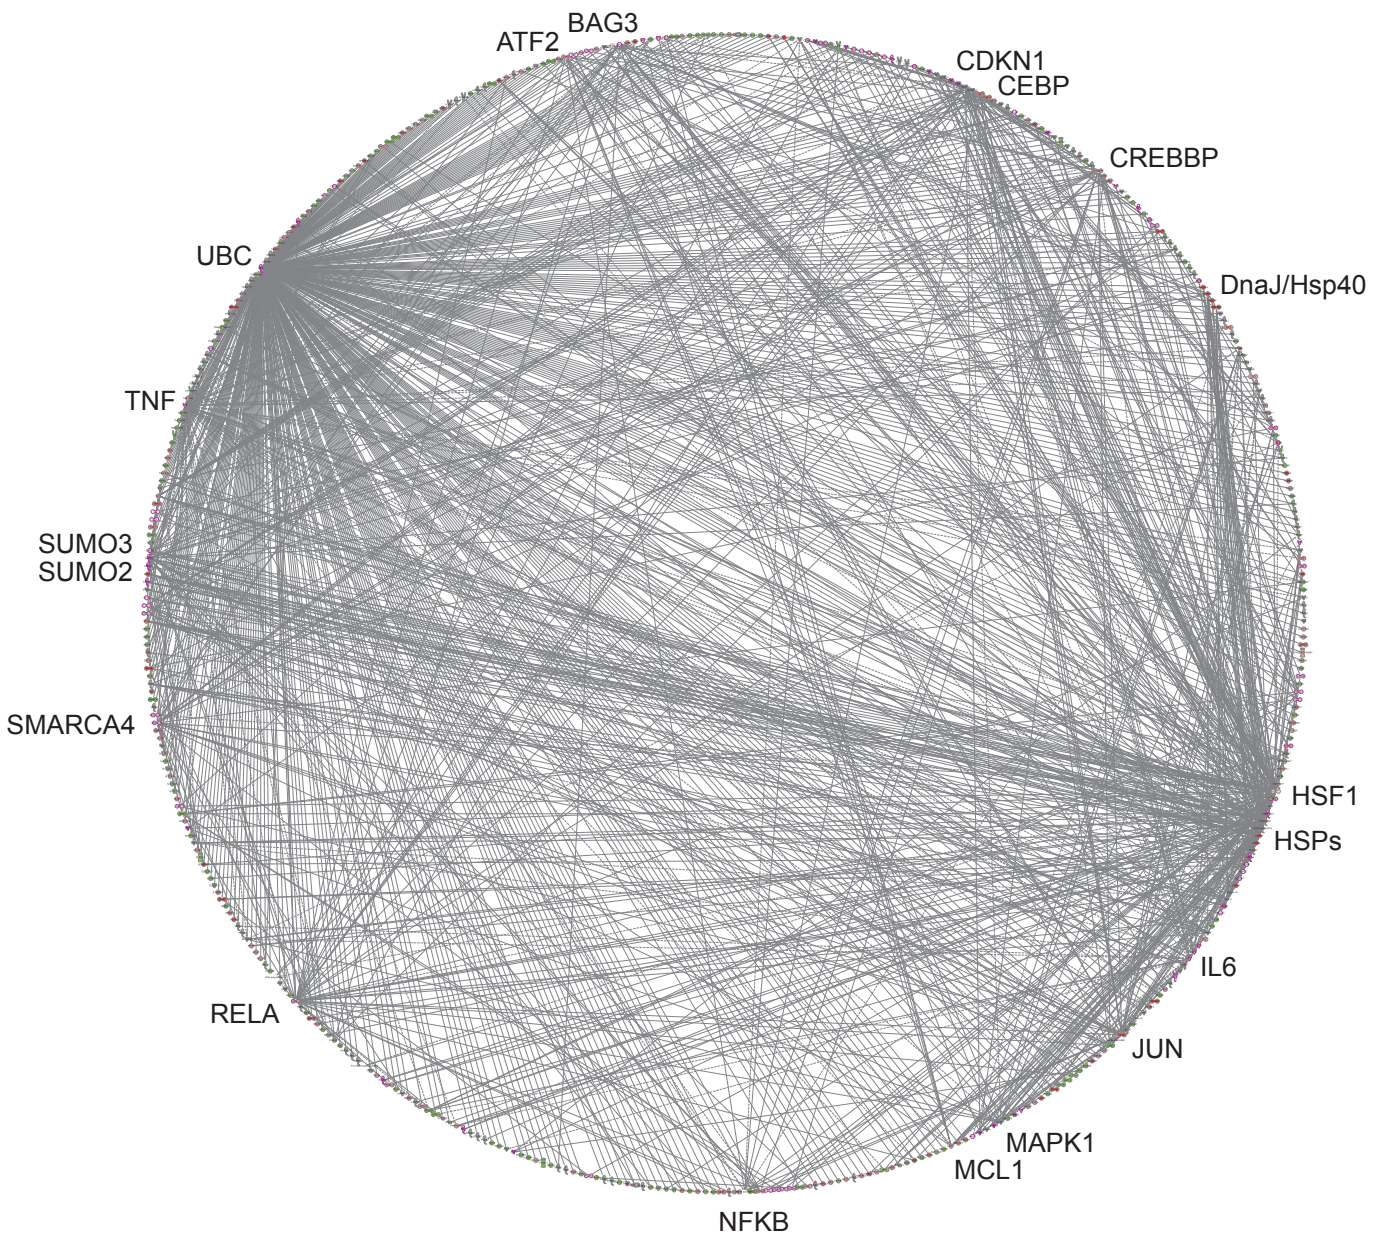

**Figure S3.** Network analysis of HSF1 and relationship with observed differentially expressed genes in heat shock response
